# Supplementary material for: The application of a high boiling point dissolution solvent on a poly(N-vinylcarbazole) host toward improving the performance of blue electrophosphorescent devices via a solution process
Source: Royal Society of Chemistry journal article supplement (doi:10.1039/c8tc00726h), 2018-01-01
Supplement: c8tc00726h1.pdf [file c8tc00726h1.pdf]

## Supporting Information

### **The application of high boiling point dissolution solvent on poly(N-vinylcarbazole) host toward improving the performance of blue electrophosphorescent devices**

Bing Yao<sup>a,b</sup>, Lihui Liu<sup>a,d</sup>, Hailong Wang<sup>a,b</sup>, Baohua Zhang<sup>a,c\*</sup>, Qingqing Yang,<sup>a</sup>  
Xuejing Liu,<sup>a</sup> Zhiyuan Xie<sup>a,\*</sup>

<sup>a</sup> State Key Laboratory of Polymer Physics and Chemistry, Changchun Institute of Applied Chemistry, Chinese Academy of Sciences, Changchun 130022, P. R. China.

<sup>b</sup> University of Chinese Academy of Sciences, Beijing 100049, P.R. China.

<sup>c</sup> Center for Advanced Analytical Science, c/o School of Chemistry and Chemical Engineering, Guangzhou University, Guangzhou 510006, P.R. China.

<sup>d</sup> Key Laboratory for Organic Electronics and Information Displays & Jiangsu Key Laboratory for Biosensors, Institute of Advanced Materials (IAM), Jiangsu National Synergetic Innovation Center for Advanced Materials (SICAM), Nanjing University of Posts & Telecommunications, 9 Wenyuan Road, Nanjing 210023, China

\*Corresponding authors.

E-mail address: bhzhang512@ciac.ac.cn (B.-H. Zhang), xiezy\_n@ciac.ac.cn (Z.-Y. Xie).

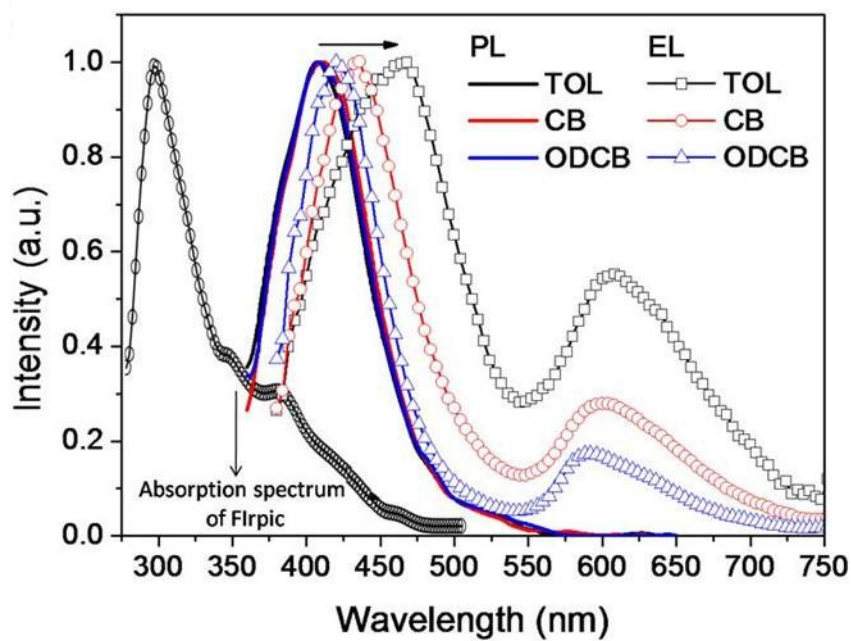

**Figure S1.** Absorption spectrum of Flrpic emitter, PL and the typical EL spectra of these PVK films using varied dissolution solvent, i.e. TOL, CB and ODCB.

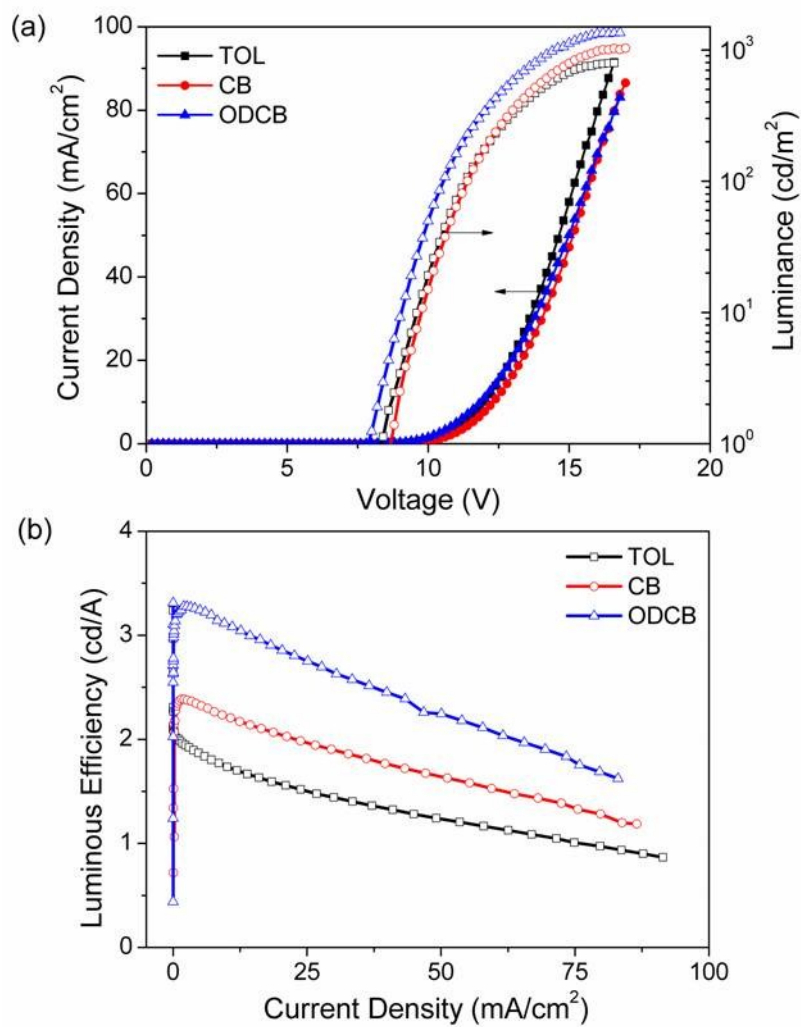

**Figure S2.** (a) J-V, L-V curves and (b) LE-J curves of PVK:FIrpic(1 wt.%) doped film based PhOLEDs.

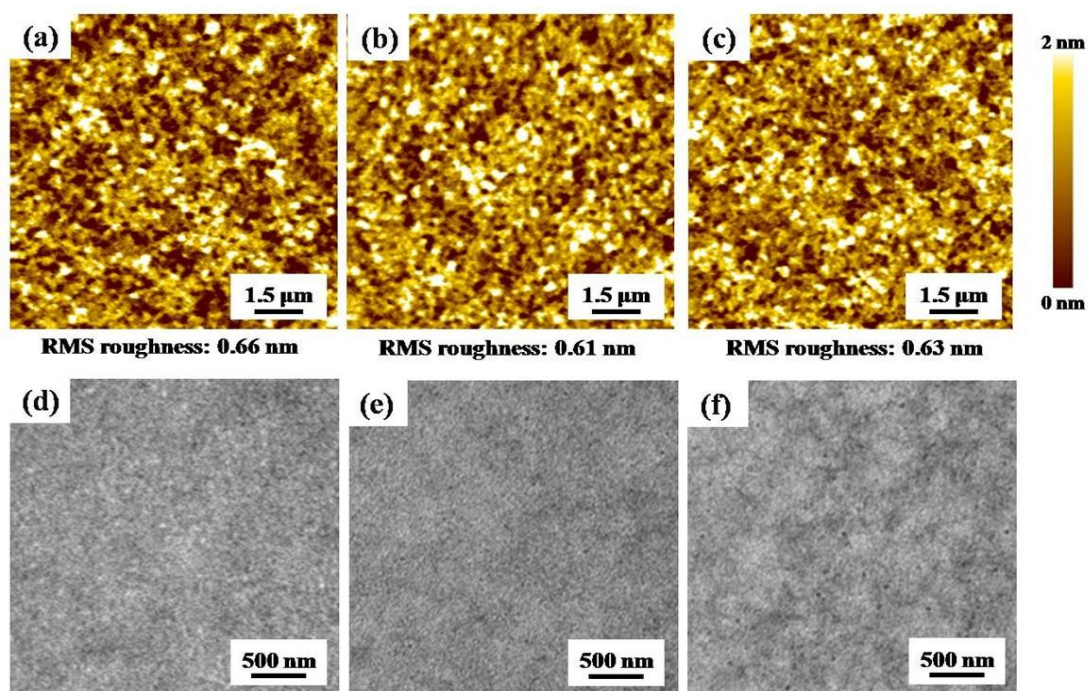

**Figure S3.** AFM and TEM morphological measurements on different PVK:FIrpic(10wt.%) doped films with varied dissolution solvents, that is TOL( a, d), CB (b, e) and ODCB (c, f).

As confirmed, there is no distinct difference among them, which confirms that the film-forming capabilities of these doped films are basically the same.

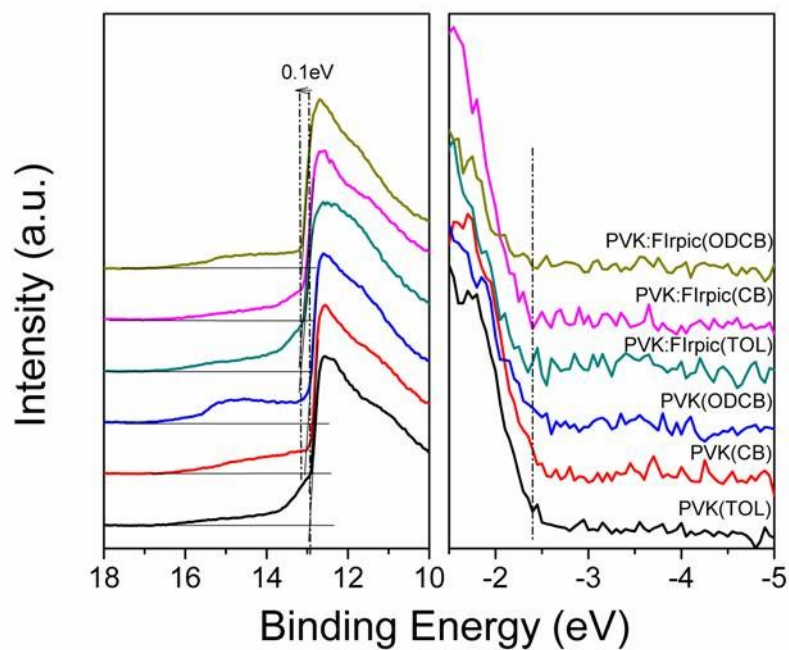

**Figure S4.** UPS spectra of these different film samples including PVK or PVK:FIrpic (10 wt.%) doped films using varied dissolution solvents. As confirmed, there is no distinct difference among them, which confirms that hole injection barriers in these devices are basically the same.
